# Supplementary material for: Carbon nanoparticles of Chinese ink-wrapped natural loofah sponge: a low-cost three-dimensional electrode for high-performance microbial energy harvesting
Source: Royal Society of Chemistry journal article supplement (doi:10.1039/c7ta03869k), 2017-01-01
Supplement: c7ta03869k1.pdf [file c7ta03869k1.pdf]

## Supporting Information

### **Carbon nanoparticles of Chinese ink-wrapped natural loofah sponge: a low-cost three-dimensional electrode for high-performance microbial energy harvesting**

Lihua Zhou<sup>b</sup>, Lihua Sun<sup>b</sup>, Peng Fu<sup>b</sup>, Chunli Yang<sup>b</sup>, and Yong Yuan<sup>a,\*</sup>

<sup>a</sup>School of Environmental Science and Engineering, Guangdong University of Technology, Guangzhou 510006, PR China

<sup>b</sup>Institute of Natural Medicine & Green Chemistry, School of Chemical Engineering and Light Industry, Guangdong University of Technology, Guangzhou 510006, China

**\*Corresponding author:**

E-mail: [yuanyong@soil.gd.cn](mailto:yuanyong@soil.gd.cn);

Tel: +8620-87025872

**Table S1 Stock suspension of 5 brands of CI used in this study**

| Chinese ink <sup>o</sup>   | Suppliers <sup>o</sup>                                            |
|----------------------------|-------------------------------------------------------------------|
| Zhujiang Ink <sup>o</sup>  | Jinjian office supplies factory,<br>Guangzhou, China <sup>o</sup> |
| Shuchang ink <sup>o</sup>  | Shaoyang renfa ink factory,<br>Hunan, China <sup>o</sup>          |
| Red apple ink <sup>o</sup> | Linyi a pen stationery Co., Ltd,<br>Shandong, China <sup>o</sup>  |
| Song ink <sup>o</sup>      | Sangzhi stationery factory,<br>Hunan, China <sup>o</sup>          |
| Xiangzi ink <sup>o</sup>   | Changsha Dongfeng Ink Co., Ltd,<br>Hunan, China <sup>o</sup>      |

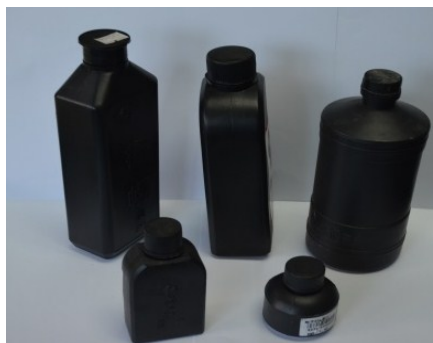**Table S2 Performances of various 3D electrodes with different skeletons and brands of CI**

| Electrodes | Chinese ink   | EIS ( $\Omega$ )                 |                 | Conductivity<br>(S/m) | j (mA/cm <sup>3</sup> ) |
|------------|---------------|----------------------------------|-----------------|-----------------------|-------------------------|
|            |               | R <sub><math>\Omega</math></sub> | R <sub>ct</sub> |                       |                         |
| CF         | No            | 4.2                              | 132.2           | 220.0 $\pm$ 6.0       | 4.0 $\pm$ 0.6           |
| LSC        | No            | 4.1                              | 10.8            | 15.8 $\pm$ 1.0        | 18.6 $\pm$ 0.6          |
| CI-SP      | Zhujiang Ink  | 4.9                              | 45.2            | 3.1 $\pm$ 0.3         | 5.6 $\pm$ 0.6           |
| CI-LS-5    | Zhujiang Ink  | 4.1                              | 13.1            | 9.5 $\pm$ 0.8         | 16.3 $\pm$ 0.6          |
| CI-LS-5    | Shuchang Ink  | 4.2                              | 42.8            | 4.3 $\pm$ 0.5         | 10.1 $\pm$ 0.4          |
| CI-LS-5    | Song Ink      | 4.0                              | 61.2            | 1.8 $\pm$ 0.4         | 5.2 $\pm$ 0.3           |
| CI-LS-5    | Red apple Ink | 3.9                              | 102.8           | 0.8 $\pm$ 0.2         | 2.8 $\pm$ 0.4           |
| CI-LS-5    | Xiangzi Ink   | 4.0                              | 127.5           | 0.3 $\pm$ 0.1         | 0.5 $\pm$ 0.1           |

**Table S3 Capital expenditure of various 3D electrodes**

| Cost <sup>a</sup>  | LSC <sup>b</sup> | CI-LS-5 <sup>c</sup> | Carbon Felt <sup>d</sup> | Graphene-Sponge <sup>e</sup> |
|--------------------|------------------|----------------------|--------------------------|------------------------------|
| Raw materials      | --               | \$ 1300              |                          |                              |
| Energy Consumption | \$ 4400          | --                   |                          |                              |
| Total              | \$ 4400          | \$ 1300              | \$ 4200                  | \$ 2000                      |

<sup>a</sup>: the cost was calculated for 1 m<sup>3</sup>.

<sup>b</sup>:The price of LSC is estimated as follows: The main cost of the LSC is assigned to the electricity for heat treatment. Our local electricity price is 0.11 US\$ for 1000 W/h and the power of the furnace used in this study is 4 kW. We can once maximally treat 200 pieces (1.0 × 1.0 × 0.5 cm). So for 1 hour heat treatment, a piece of LSC costs 0.0022 US\$, and the cost of LSC can be roughly calculated to be 4,400 UD \$/m<sup>3</sup>.

<sup>c</sup>:The price of CI-LS-5 is estimated as follows: The main cost of the CI-LS-5 is assigned to the CI. For instance, the price of Zhujiang ink is ca. 1.3 \$/L. To make one piece of CI-LS-5 (1.0 × 1.0 × 0.5 cm), 0.5 mL ink is consumed. The cost of CI-LS-5 can be roughly calculated to be 1,300 UD \$/m<sup>3</sup>.

<sup>d</sup>: Purchased from JinGu Carbon Material CO., LTD. (Liaoning, China).

<sup>e</sup>: Calculated by Xie et al. (*Energy Environ. Sci.* **2012**, 5, 6862–6866).

Note: the unit price used here is based on lab scale, which should be higher than unit price for industrial use.

**Figure S1**

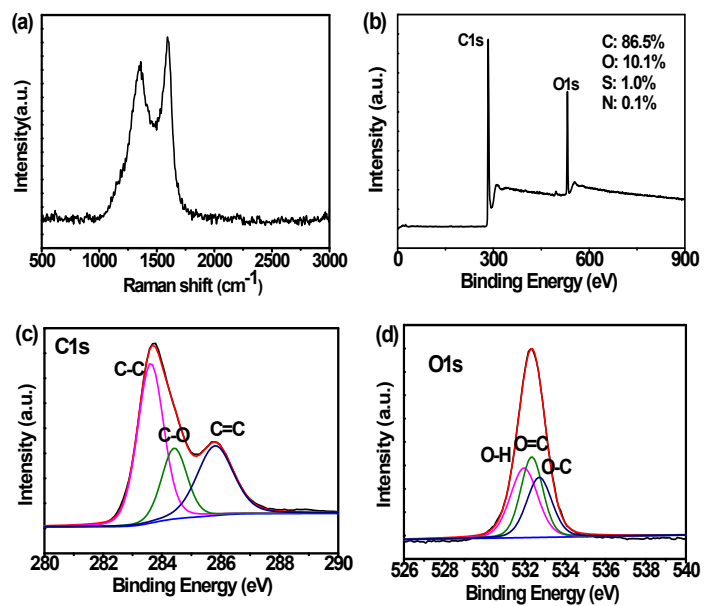

**Figure S1** Chemical characterization of the traditional CI. (a) Raman spectrum of the traditional CI; (b) Full-scan XPS of the CI; (c) high resolution C 1s XPS scan of the CI; (d) high resolution O 1s XPS scan of the CI.

Figure S2

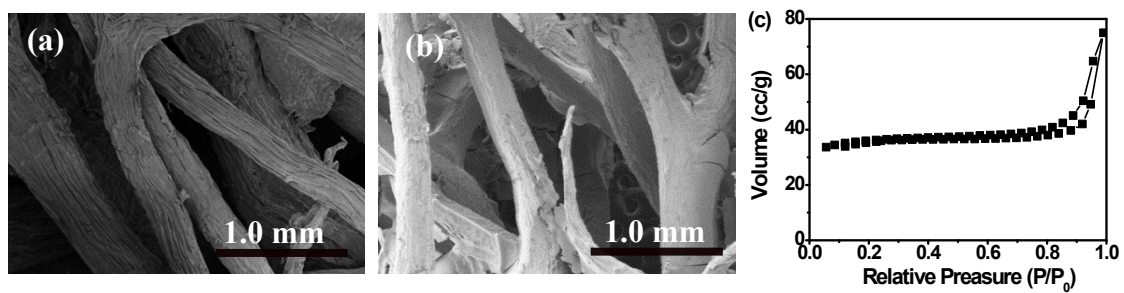

**Figure S2** SEM images of the LS before (a) and after (b) application of the ink coating at low magnification, and (c)  $N_2$  adsorption–desorption isotherm for CI-LS-5 electrode.

**Figure S3**

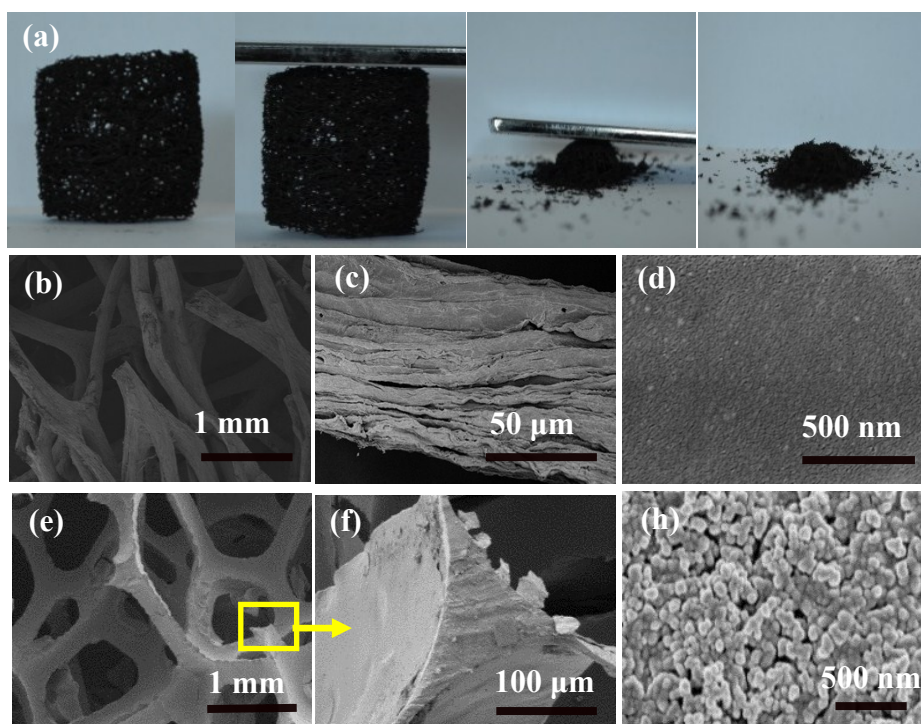

**Figure S3** (a) A set of pictures shows the irretrievable process of a compressed LSC; (b-d) SEM images of the LSC; (e-h) SEM images of the CI-SP.

Figure S4

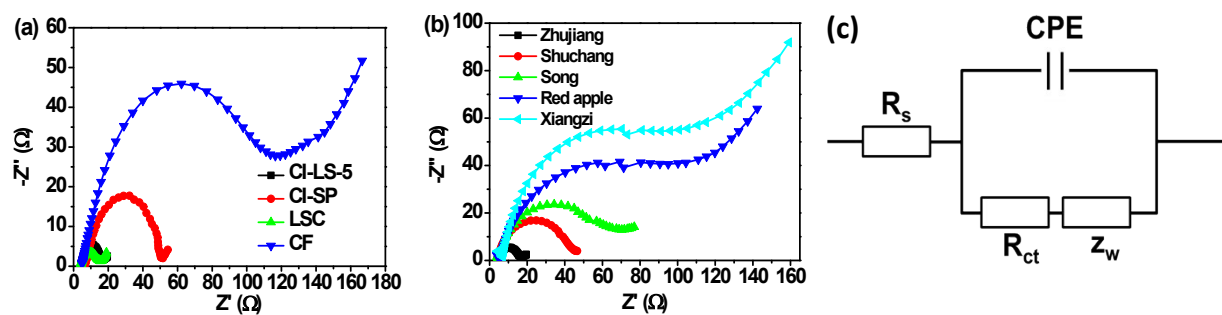

Figure S4 EIS tests for various 3D electrodes (a), CI-LS-5 electrodes with different brands of CI (b), and the equivalent circuit (c).

Figure S5

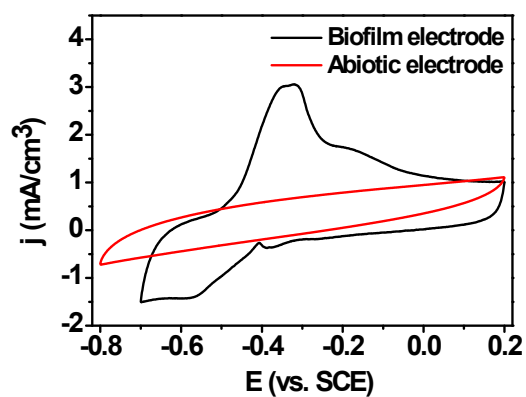

Figure S5 CV of electroactive biofilms grown on the CI-LS-5 electrode in the absence of acetate (Black line) and CV of CI-LS-5 electrode before biofilm growth (Red line) at scan rate of 5 mV/s.



Figure S6

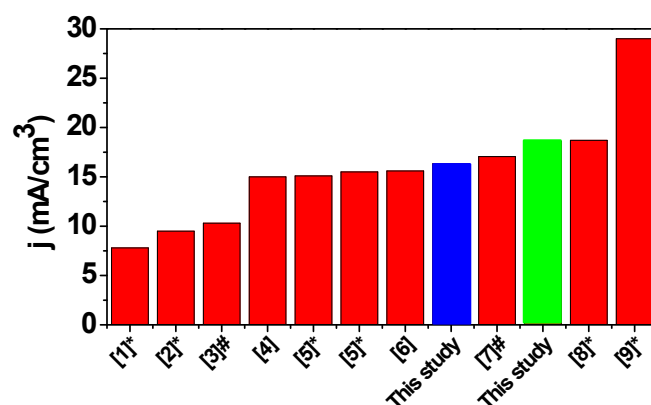

**Figure S6** Comparison of CI-LS-5 electrode performance with that of the current state-of-the-art electrodes (The number in brackets indicates the corresponding reference; the blue and green columns represent the CI-LS-5 and LSC electrodes, respectively. The # symbol indicates the use of graphene or carbon nanotubes for constructing 3D electrodes, and the \* symbol indicates the use of pyrolysis to fabricate 3D electrodes).

#### References

- [1] Flexer, V.; Donose, B.C.; Lefebvre, C.; Pozo, G.; Boone, M.N.; Hoorebeke, L.V.; Baccour, M.; Bonnet, L.; Calas-Etienne, S.; Galarneau, A.; Titirici, M.M.; Brun, N. Microcellular electrode material for microbial bioelectrochemical systems synthesized by hydrothermal carbonization of biomass derived precursors. *ACS Sustainable Chem. Eng.* **2016**, *4*, 2508–2516.
- [2] Massazza, D.; Parra, R.; Busalmen, J.; Romeo, H. New ceramic electrodes allow reaching the target current density in bioelectrochemical systems. *Energy Environ. Sci.* **2015**, *8*, 2707–2712.
- [3] Flexer, V.; Chen, J.; Donose, B.; Sherrell, P.; Wallace, G.; Keller, J. The nanostructure of three-dimensional scaffolds enhances the current density of microbial bioelectrochemical systems. *Energy Environ. Sci.* **2013**, *6*, 1291–1298.
- [4] Guo, K.; Donose, B.C.; Soeriyadi, A.H.; PrevotEAU, A.; Patil, S.A.; Freguia, S.; Gooding, J.J.; Rabaey, K. Flame oxidation of stainless steel felt enhances anodic biofilm formation and current output in bioelectrochemical systems. *Environ. Sci. Technol.* **2014**, *48*, 7151–7156.
- [5] Karthikeyan, R.; Wang, B.; Xuan, J.; Wong, J.; Lee, P.; Leung, M. Interfacial electron transfer and bioelectrocatalysis of carbonized plant material as effective anode of microbial fuel cell. *Electrochem. Acta* **2015**, *157*, 314–323.
- [6] Ketep, S.; Bergel, A.; Calmet, A.; Erable, B. Stainless steel foam increases the current provided by microbial bioanodes for bioelectrochemical systems. *Energy Environ. Sci.* **2014**, *7*, 1633–1637.
- [7] Katuri, K.; Ferrer, M.; Gutiérrez, M.; Jiménez, R.; Monte, F.; Leech, D. Three-dimensional microchanneled electrodes in flow-through configuration for bioanode formation and current generation. *Energy Environ. Sci.* **2011**, *4*, 4201–4210.
- [8] Chen, S.; Liu, Q.; He, G.; Zhou, Y.; Hanif, M.; Peng, X.; Wang, S.; Hou, H. Reticulated carbon foam derived from a sponge-like natural product as a high-performance anode in microbial fuel cells. *J. Mater. Chem.* **2012**, *22*, 18609–18613.
- [9] Chen, S.; He, G.; Hu, X.; Xie, M.; Wang, S.; Zeng, D.; Hou, H.; Schröder, U. Layered corrugated electrode macrostructures boost microbial bioelectrocatalysis. *Energy Environ. Sci.* **2012**, *5*, 9769–6772.

Figure S7

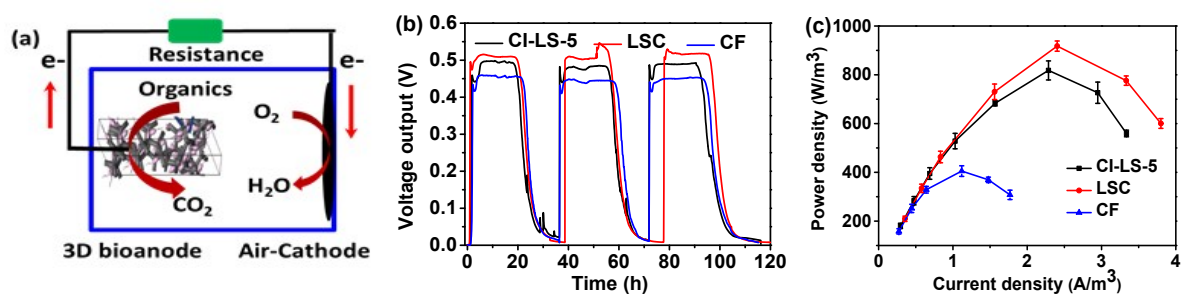

**Figure S7** The performance of the as-prepared 3D electrode was examined in a single-chamber microbial fuel cell with an air-cathode. (a) Schematic of the basic configuration of a single chamber air-cathode MFC, in which a wet-proofed carbon cloth loaded with Pt/C is used as an air cathode and a biofilm-attached 3D electrode is used as a bioanode; (b) voltage output curves of the MFCs equipped with different anodes at 1000 ohm; (c) power output curves of the MFCs equipped with different anodes.

**Figure S8**

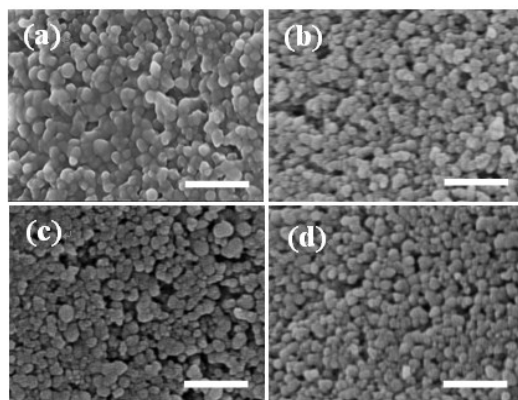

**Figure S8** SEM images of four brands of CI used for coating LS (Scale bar: 1  $\mu\text{M}$ ): (a) Shuchang Ink; (b) Song Ink; (c) Red apple Ink; (d) Xiangzi Ink.

Figure S9

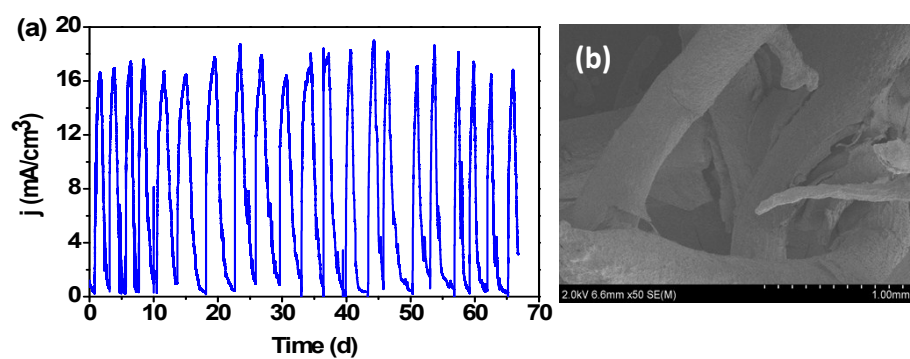

**Figure S9** (a) Bioelectrocatalytic current generation at the CI-LS-5 electrode versus time during long-term operation; (b) SEM image of the bioelectrode after 70 days of operation.
